# Supplementary material for: Inhibitory Effect and Mechanism of Chitosan–Ag Complex Hydrogel on Fungal Disease in Grape
Source: Preprints.org preprint supplement (doi:10.20944/preprints202112.0291.v1), 2021-12-17
Supplement: Supplementary file 1 [file supplementary]

**Inhibitory effect and mechanism of chitosan–Ag complex hydrogel on fungal disease in Grape**

Weizhong He1,2, Yajuan Zhu3*, Qi Shen1,2, Zhenyu Hua1,2, Xian Wang1,2, Peng Xue1,2*

(1. Institute of Quality Standards & Testing Technology for Agro-Products, Xinjiang Academy of Agricultural Sciences, Urumqi 830091, China; 2. Key Laboratory of Agro-Product Quality and Safety of Xinjiang, Laboratory of Quality and Safety Risk Assessment for Agro-Products (Urumqi), Ministry of Agriculture and Rural Affairs, Urumqi 830091, China; 3. The Center for Disease Control and Prevention of Xinjiang Production and Construction Crops, Urumqi, Xinjiang 830002, China.)

**E-mail:** hewei198112@126.com, zhuyajuan1988@126.com, huakobe@163.com, wangxian_707@163.com, [xuepeng416@126.com](mailto:xuepeng416@126.com)

**Keywords:** silver, chitosan, hydrogel, antibacterial property, grape

**Figure S1.** The image of dominant pathogenic fungi isolated from grape.

(a: *P. expansum*, b: *A. niger* and c: *B. cinerea*.)

a ITS1, Serial number:

TTGCGGTTACCCTACCTACTTCTGGTATCCCCCACTCCCATGGTGTGACGGGCGGTGTGTACAAGACCCGGGAACGTATTCACCGCAGTATGCTGACCTGCGATTACTAGCGATTCCGACTTCATGCACTCGAGTTGCAGAGTGCAATCCGGACTACGATCGGTTTTGTGAGATTGGCTCCGCCTCGCGGCTTGGCTACCCTCTGTACCGACCATTGTATGACGTGTGAAGCCCTGGTCATAAGGGCCATGAGGACTTGACGTCATCCCCACCTTCCTCCGGCTTGTCACCGGCAGTCTCATTAGAGTGCCCAACCGAATGATGGCAACTAATGACAAGGGTTGCGCTCGTTGCGGGACTTAACCCAACATCTCACGACACGAGCTGACGACAGCCATGCAGCACCTGTGTTACGGCTCCCGAAGGCACTCCTCCGTCTCCGGAGGATTCCGCACATGTCAAAACCAGGTAAGGTTCTTCGCGTTGCATCGAATTAATCCACATCATCCACCGCTTGTGCGGGTCCCCGTCAATTCCTTTGAGTTTTAATCTTGCGACCGTACTCCCCAGGCGGTCAATTTCACGCGTTAGCTACGCTACCAAGCAATCAAGTTGCCCAACAGCTAATTGACATCGTTTAGGGCGTGGACTACCAGGGTATCTAATCCTGTTTGCTACCCACGCTT

a ITS4, Serial number:

TCGGACATGAACGTCAGTGTTATCCCAGGAGGCTGCCTTCGCCATCGGTATTCCTCCACATCTCTACGCATTTCACTGCTACACGTGGAATTCCACCTCCCTCTGACACACTCGAGTCACCCAGTTCAGAACGCAGTTCCCGGGTTGAGCCCGGGGATTTCACATCCTGCTTAAGTAACCGTCTGCGCCCGCTTTACGCCCAGTAATTCCGATTAACGCTCGCACCCTACGTATTACCGCGGCTGCTGGCACGTAGTTAGCCGGTGCTTATTCTTCAGGTACCGTCATCGGCCGCCGATATTGGCAACAGCCTTTTCTTCCCTGACAAAAGTCCTTTACAACCCGAAGGCCTTCTTCAGACACGCGGCATGGCTGGATCAGGCTTGCGCCCATTGTCCAAAATTCCCCACTGCTGCCTCCCGTAGGAGTCTGGGCCGTGTCTCAGTCCCAGTGTGGCGGATCATCCTCTCAGACCCGCTACTGATCGTCGCCTTGGTGGGCCTTTACCCCGCCAACCAGCTAATCAGATATCGGCCGCTCGGATAGCGCAAGGCCCGAAGGTCCCCTGCTTTCCCTCTCAAGACGTATGCGGTATTAGCTGATCTTTCGATCAGTTATCCCCCGCTACCCGGTACGTTCCGATATGTTACTCACCCGTTCGCCACTCGCCACCCGAGAAGCAAGCT


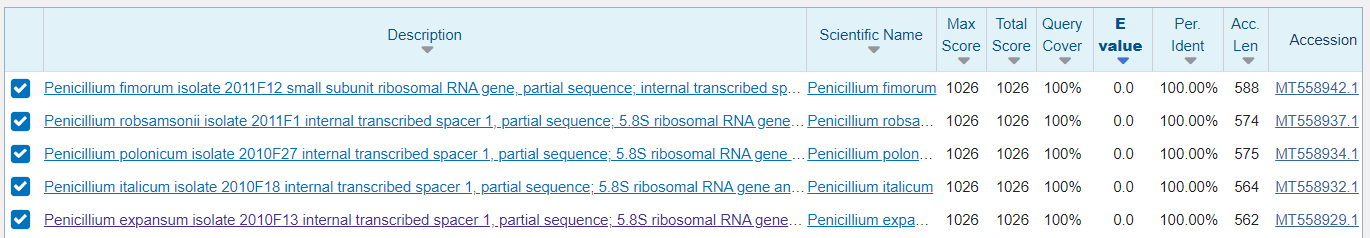


b ITS1, Serial number:

TGGSTTCGCTTCGTAGGTGACCTGCGGAGGATCATTACCGAGTGCGGGTCCTTTGGGCCCAACCTCCCATCCGTGTCTATTATACCCTGTTGCTTCGGCGGGCCCGCCGCTTGTCGGCCGCCGGGGGGGCGCCTTTGCCCCCCGGGCCCGTGCCCGCCGGAGACCCCAACACGAACACTGTCTGAAAGCGTGCAGTCTGAGTTGATTGAATGCAATCAGTTAAAACTTTCAACAATGGATCTCTTGGTTCCGGCATCGATGAAGAACGCAGCGAAATGCGATAACTAATGTGAATTGCAGAATTCAGTGAATCATCGAGTCTTTGAACGCACATTGCGCCCCCTGGTATTCCGGGGGGCATGCCTGTCCGAGCGTCATTGCTGCCCTCAAGCCCGGCTTGTGTGTTGGGTCGCCGTCCCCCTCTCCGGGGGGACGGGCCCGAAAGGCAGCGGCGGCACCGCGTCCGATCCTCGAGCGTATGGGGCTTTGTCACATGCTCTGTAGGATTGGCCGGCGCCTGCCGACGTTTTCCAACCATTTTTTCCAGGTTGACCTCGGATCAGGTAGGGATACCCGCTGAACTTAAGCATATCAATAAGCCGGAGGAA

b ITS4, Serial number:

AGASTGGATCCTACTGATCCGAGGTCACCTGGAAAAAATGGTTGGAAAACGTCGGCAGGCGCCGGCCAATCCTACAGAGCATGTGACAAAGCCCCATACGCTCGAGGATCGGACGCGGTGCCGCCGCTGCCTTTCGGGCCCGTCCCCCCGGAGAGGGGGACGGCGACCCAACACACAAGCCGGGCTTGAGGGCAGCAATGACGCTCGGACAGGCATGCCCCCCGGAATACCAGGGGGCGCAATGTGCGTTCAAAGACTCGATGATTCACTGAATTCTGCAATTCACATTAGTTATCGCATTTCGCTGCGTTCTTCATCGATGCCGGAACCAAGAGATCCATTGTTGAAAGTTTTAACTGATTGCATTCAATCAACTCAGACTGCACGCTTTCAGACAGTGTTCGTGTTGGGGTCTCCGGCGGGCACGGGCCCGGGGGGCAAAGGCGCCCCCCCGGCGGCCGACAAGCGGCGGGCCCGCCGAAGCAACAGGGTATAATAGACACGGATGGGAGGTTGGGCCCAAAGGACCCGCACTCGGTAATGATCCTTCCGCAGGTTCACCTACGGAAACCTTGTTACGACTTTTACTTCCTCAAGGGRAMCCAAGRA


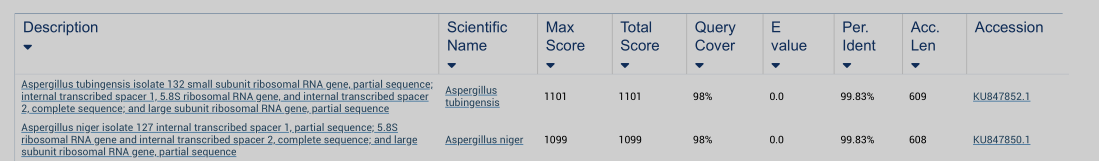


c ITS1, Serial number:

AGSCAGCGCTTCCGTAGGTGACCTGCGGAGGATCATTACAGAGTTCATGCCCGAAAGGGTAGACCTCCCACCCTTGTGTATTATTACTTTGTTGCTTTGGCGAGCTGCCTTCGGGCCTTGTATGCTCGCCAGAGAAAACCAAAACTCTTTTTATTAATGTCGTCTGAGTACTATATAATAGTTAAAACTTTCAACAACGGATCTCTTGGTTCTGGCATCGATGAAGAACGCAGCGAAATGCGATAAGTAATGTGAATTGCAGAATTCAGTGAATCATCGAATCTTTGAACGCACATTGCGCCCCTTGGTATTCCGGGGGGCATGCCTGTTCGAGCGTCATTTCAACCCTCAAGCTTAGCTTGGTATTGAGTCTATGTCAGTAATGGCAGGCTCTAAAATCAGTGGCGGCGCCGCTGGGTCCTGAACGTAGTAATATCTCTCGTTACAGGTTCTCGGTGTGCTTCTGCCAAAACCCAAATTTTTCTATGGTTGACCTCGGATCAGGTAGGGATACCCGCTGAACTTAAGCATATCAAARCSCGGAGGAAA

c ITS4, Serial number:

TRTGGAGCTACCTGATCCGAAGGTCACCATTAGAAAAATTTGGGTTTTGGCAGAAGCACACCGAGAACCTGTAACGAGAGATATTACTACGTTCAGGACCCAGCGGCGCCGCCACTGATTTTAGAGCCTGCCATTACTGACATAGACTCAATACCAAGCTAAGCTTGAGGGTTGAAATGACGCTCGAACAGGCATGCCCCCCGGAATACCAAGGGGCGCAATGTGCGTTCAAAGATTCGATGATTCACTGAATTCTGCAATTCACATTACTTATCGCATTTCGCTGCGTTCTTCATCGATGCCAGAACCAAGAGATCCGTTGTTGAAAGTTTTAACTATTATATAGTACTCAGACGACATTAATAAAAAGAGTTTTGGTTTTCTCTGGCGAGCATACAAGGCCCGAAGGCAGCTCGCCAAAGCAACAAAGTAATAATACACAAGGGTGGGAGGTCTACCCTTTCGGGCATGAACTCTGTAATGATCCTTCCGCAGGTTCACCTACGGAAACCTTGTTACGACTTTTACTTCCTCAAGRGGACARRRACC


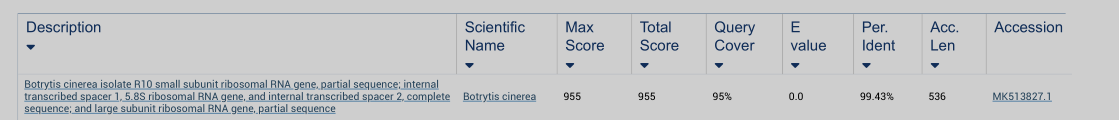


**Figure S2.** Identification of dominant pathogenic fungi isolated from grape. (a: *P. expansum*, b: *A. niger* and c: *B. cinerea*.)


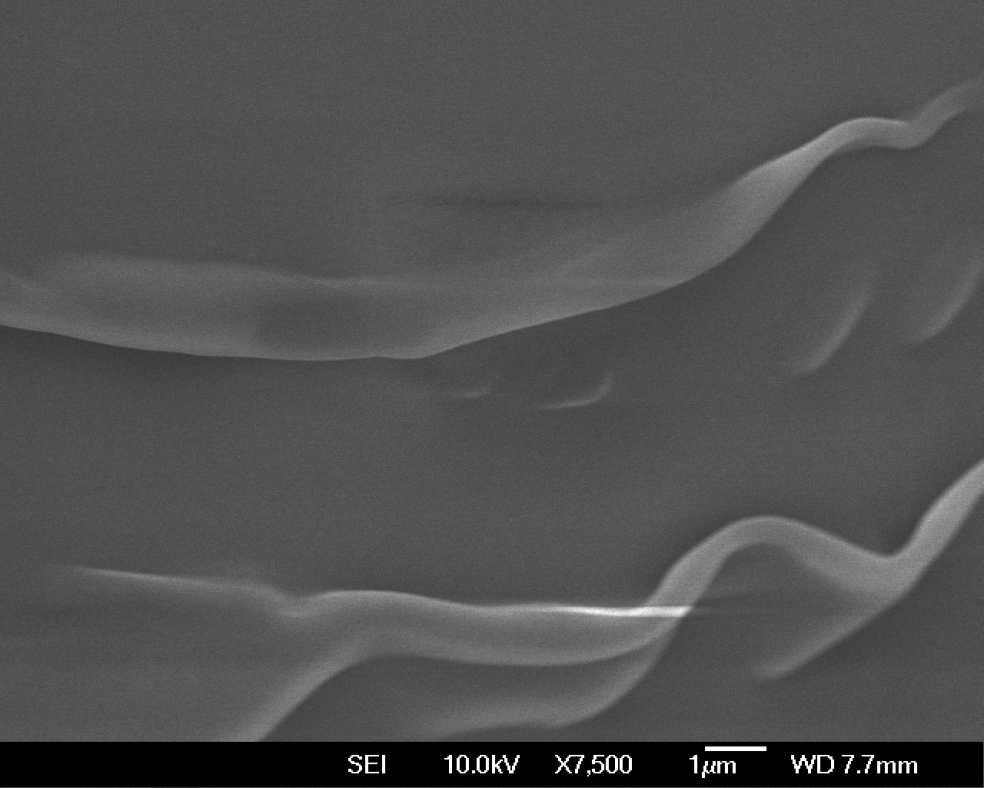


**Figure S3.** SEM image of the CS gel.

**
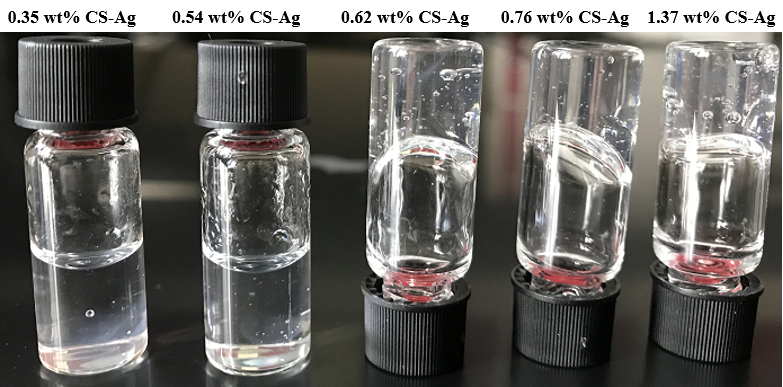
**

**Figure S4.** The CGC of CS-Ag complex hydrogel.


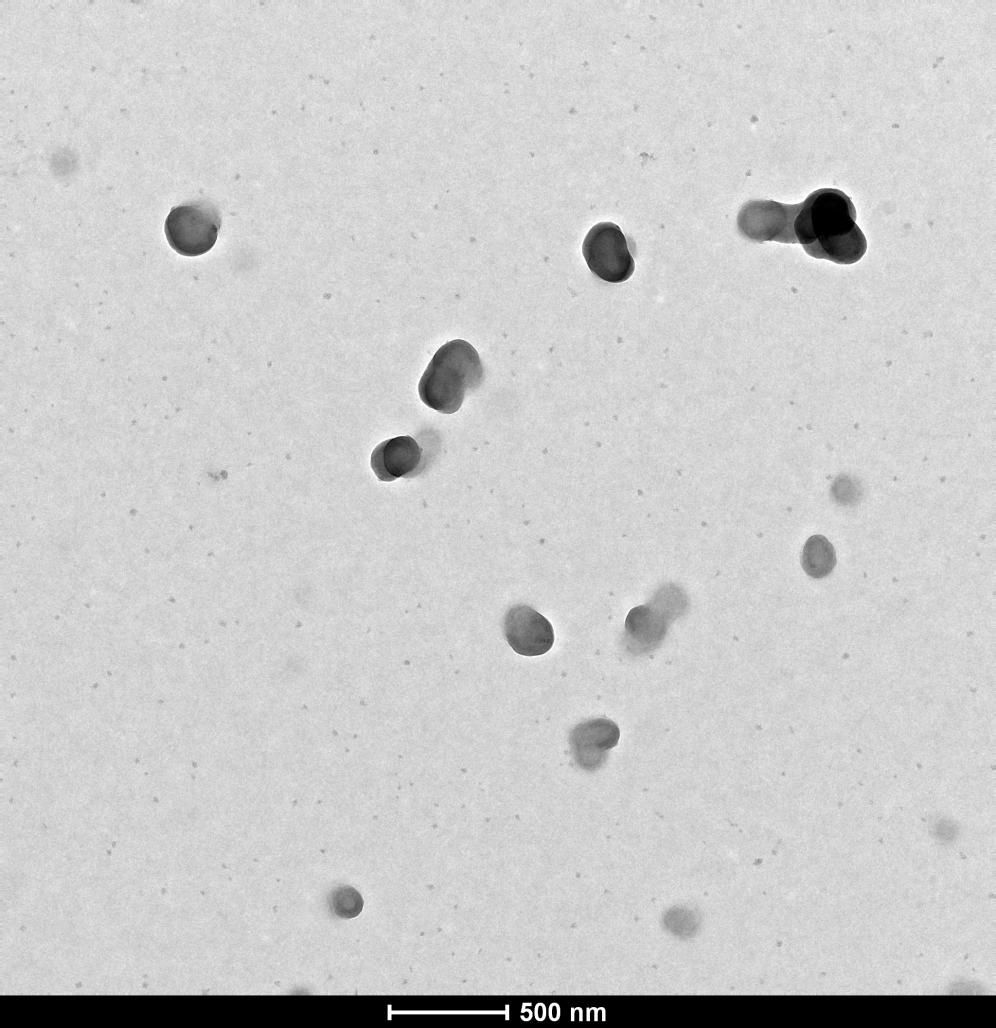


**Figure S5.** TEM image of AgNPs.

**Figure S6.**CS-Ag hydrogel effect on decay rate of grape during postharvest.

**Figure S7.** CS-Ag hydrogel effect on weight loss rate of grape during postharvest.

**Figure S8.** CS-Ag hydrogel effect on soluble solids of grape during postharvest.

**Figure S9.** CS-Ag hydrogel effect on titratable acids of grape during postharvest.

**Figure S10.**CS-Ag hydrogel effect on Vitamin C of grape during postharvest.
